# Supplementary material for: A Functional Magnetic Resonance Imaging Study of Verbal Working Memory in Young People at Increased Familial Risk of Depression
Source: PubMed Central journal article supplement (PMC2890050; doi:10.1016/j.biopsych.2009.10.006), 2010-03-01
Supplement: mmc1.pdf [file mmc1.pdf]

### Supplemental Information

**Table S1.** Linear load response activity. Displayed are Pearson's  $r$  values and associated significance in family history positive participants. Lateral occipital cortex and superior temporal gyrus refer to the significant clusters identified in the linear load response activity contrast.

|                          | N-back performance | Full scale IQ |       | Lateral occipital cortex |       | Superior temporal gyrus |            | Age   |       |
|--------------------------|--------------------|---------------|-------|--------------------------|-------|-------------------------|------------|-------|-------|
|                          |                    | $r$           | $P$   | $r$                      | $P$   | $r$                     | $P$        | $r$   | $P$   |
| N-back performance       | 1                  | 0.123         | 0.649 | -0.284                   | 0.286 | -0.276                  | 0.3        | 0.058 | 0.83  |
| Full scale IQ            |                    | 1             |       | -0.028                   | 0.91  | -0.149                  | 0.569      | 0.16  | 0.54  |
| Lateral occipital cortex |                    |               |       | 1                        |       | <i>N/A</i>              | <i>N/A</i> | 0.137 | 0.6   |
| Superior temporal gyrus  |                    |               |       |                          |       | 1                       |            | 0.195 | 0.454 |
| Age                      |                    |               |       |                          |       |                         |            | 1     |       |

*N/A*, not applicable.

**Table S2.** Linear load response activity. Displayed are Pearson's  $r$  values and associated significance in healthy controls. Details as in Table S1.

|                          | N-back performance | Full scale IQ |      | Lateral occipital cortex |       | Superior temporal gyrus |            | Age    |       |
|--------------------------|--------------------|---------------|------|--------------------------|-------|-------------------------|------------|--------|-------|
|                          |                    | $r$           | $P$  | $r$                      | $P$   | $r$                     | $P$        | $r$    | $P$   |
| N-back performance       | 1                  | 0.249         | 0.39 | -0.605                   | *0.02 | -0.477                  | 0.085      | 0.162  | 0.518 |
| Full scale IQ            |                    | 1             |      | -0.027                   | 0.95  | -0.295                  | 0.285      | 0.041  | 0.885 |
| Lateral occipital cortex |                    |               |      | 1                        |       | <i>N/A</i>              | <i>N/A</i> | -0.202 | 0.471 |
| Superior temporal gyrus  |                    |               |      |                          |       | 1                       |            | -0.019 | 0.945 |
| Age                      |                    |               |      |                          |       |                         |            | 1      |       |

\*  $P < 0.05$ .

**Table S3.** Quadratic load response activity. Displayed are Pearson's  $r$  values and associated significance in family history positive participants. Parietal/precuneal border refers to the significant cluster identified in the quadratic load response activity contrast.

|                           | N-back performance | Full scale IQ |       | Parietal/precuneal border |       | Age    |      |
|---------------------------|--------------------|---------------|-------|---------------------------|-------|--------|------|
|                           |                    | $r$           | $P$   | $r$                       | $P$   | $r$    | $P$  |
| N-back performance        | 1                  | 0.123         | 0.649 | 0.126                     | 0.643 | 0.058  | 0.83 |
| Full scale IQ             |                    | 1             |       | 0.026                     | 0.921 | 0.16   | 0.83 |
| Parietal/precuneal border |                    |               |       | 1                         |       | -0.192 | 0.46 |
| Age                       |                    |               |       |                           |       | 1      |      |

**Table S4.** Quadratic load response activity. Displayed are Pearson's  $r$  values and associated significance in healthy controls. Details as in Table S3.

|                           | N-back performance | Full scale IQ |      | Parietal/precuneal border |       | Age    |       |
|---------------------------|--------------------|---------------|------|---------------------------|-------|--------|-------|
|                           |                    | $r$           | $P$  | $r$                       | $P$   | $r$    | $P$   |
| N-back performance        | 1                  | 0.249         | 0.39 | -0.196                    | 0.502 | 0.162  | 0.518 |
| Full scale IQ             |                    | 1             |      | 0.059                     | 0.835 | 0.041  | 0.885 |
| Parietal/precuneal border |                    |               |      | 1                         |       | -0.188 | 0.502 |
| Age                       |                    |               |      |                           |       | 1      |       |
